# Supplementary material for: Facile one-step hydrazine-assisted solvothermal synthesis of nitrogen-doped reduced graphene oxide: reduction effect and mechanisms
Source: Royal Society of Chemistry journal article supplement (doi:10.1039/c2ra21825a), 2012-11-15
Supplement: c2ra21825a.pdf [file c2ra21825a.pdf]

## Supporting Information

### Facile One-step Hydrazine-assisted Solvothermal Synthesis of Nitrogen-doped Reduced Graphene Oxide: Reduction Effect and Mechanisms

*Ronghua Wang, Yan Wang, Chaohe Xu, Jing Sun\* and Lian Gao*

The State Key Lab of High Performance Ceramics and Superfine Microstructure,  
Shanghai Institute of Ceramics, Chinese Academy of Sciences, 1295 Ding Xi Road,  
Shanghai 200050, China

\* Corresponding authors: Tel: +86 21 52414301. Fax: +86 21 52413122.

E-mail address: [jingsun@mail.sic.ac.cn](mailto:jingsun@mail.sic.ac.cn) (J. Sun)

**Table S1.** FTIR peak assignments and positions ( $\text{cm}^{-1}$ ) for Graphite, GO and RGOs under various reduction conditions. [ $\nu$ ] stretch, [ $\delta$ ] bend, [n/o] not observed.

| Peak assignment       | Peak position ( $\text{cm}^{-1}$ ) |      |        |       |        |
|-----------------------|------------------------------------|------|--------|-------|--------|
|                       | graphite                           | GO   | 87-95* | 0-180 | 87-180 |
| $\nu(\text{C-H})$     | n/o                                | n/o  | 2920   | 2926  | 2920   |
| $\nu(\text{C-H}_2)$   | n/o                                | n/o  | 2852   | 2852  | 2850   |
| $\nu(\text{C=O})$     | n/o                                | 1733 | 1721   | 1717  | n/o    |
| $\nu(\text{C=C})$     | 1637                               | 1634 | 1618   | 1570  | 1611   |
| $\nu(\text{C=N})$     | n/o                                | n/o  | 1653   | n/o   | n/o    |
| $\delta(\text{C-OH})$ | n/o                                | 1385 | n/o    | 1376  | n/o    |
| $\nu(\text{C-N})$     | n/o                                | n/o  | 1285   | n/o   | 1293   |
| $\nu(\text{C-O-C})$   | n/o                                | 1227 | n/o    | 1220  | n/o    |
| $\nu(\text{C-O})$     | 1089                               | 1090 | n/o    | n/o   | n/o    |

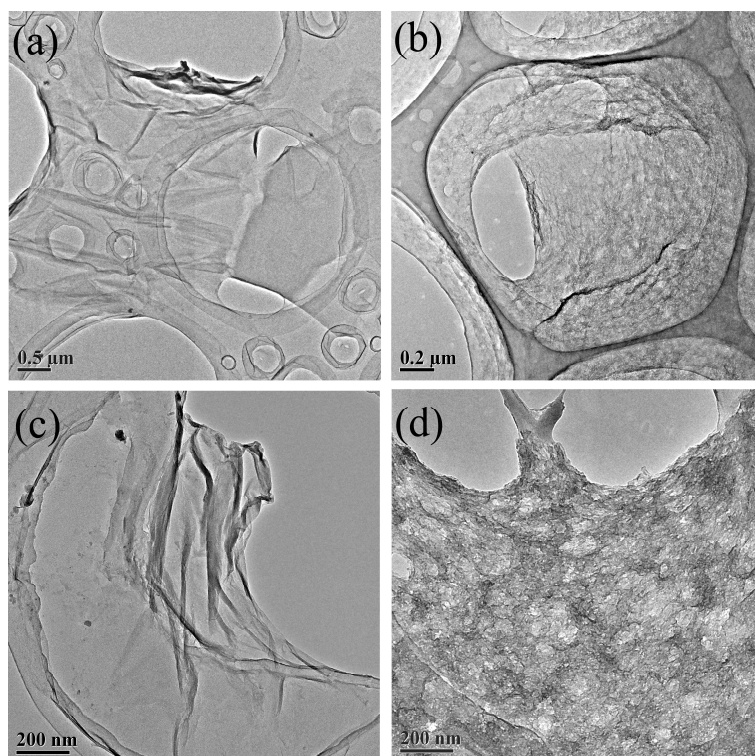

**Figure S1.** TEM images of RGO sheets: (a) RGO-44-180; (b) RGO-87-180; (c) RGO-200-180; (d) RGO-87-120; (e) RGO-87-150 and (f) RGO-87-200.

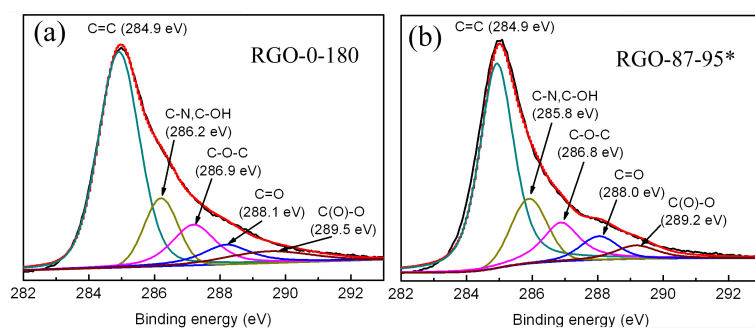

**Figure S2.** C1s XPS spectra of (a) RGO-0-180 and (b) RGO-87-95\*.

The absolute content of individual oxygen-containing functional groups were estimated by the percentage of the certain group (the area of the peak divided by the total area of all peaks for oxygen-containing functional groups, multiplied by 1 (for C-OH, and C=O), 1/2 (for C-O-C) or 2 (for O=C-OH)) multiplied by the content of O atoms in the whole materials<sup>1</sup>.

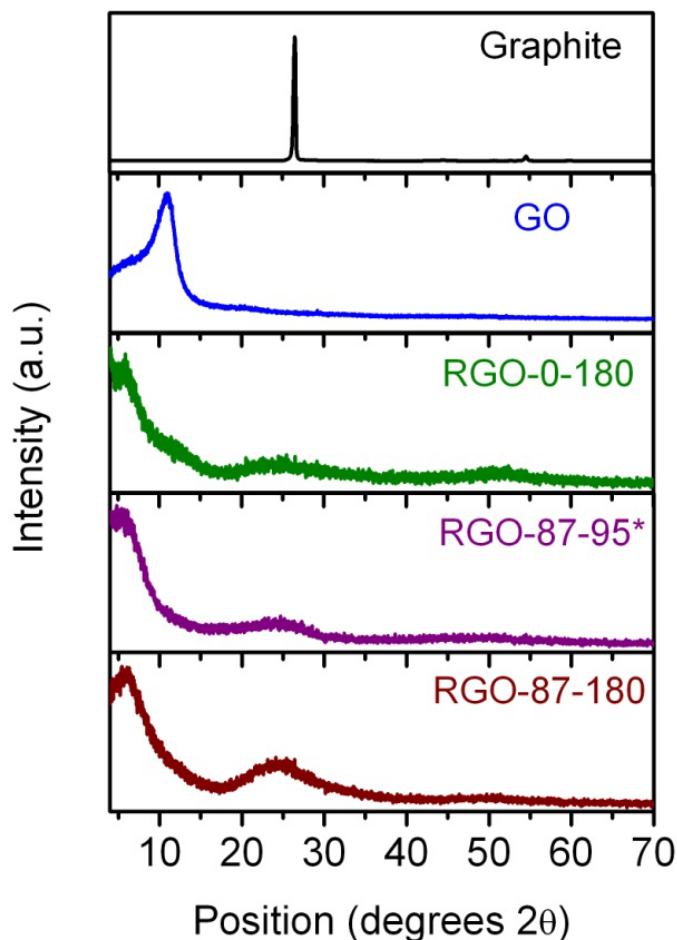

**Figure S3.** XRD patterns of GO and RGOs. For the pristine graphite, the (002) diffraction peak is at  $26.51^\circ$  and the interplane distance is  $3.36 \text{ \AA}$ . The diffraction peaks of RGOs are at  $24.3^\circ$  for RGO-0-180,  $23.9^\circ$  for RGO-87-95\*,  $24.8^\circ$  for RGO-87-180, corresponding to an interlayer  $d$  spacing of  $3.66 \text{ \AA}$ ,  $3.72 \text{ \AA}$ ,  $3.58 \text{ \AA}$ , respectively. It is obvious that the  $d$ -spacing value of RGO-87-180 is the lowest and closest to that of pristine graphite, suggesting the most thorough removal of oxygen-containing groups and recovery of graphitic crystal structure. In addition, the peak of RGO-87-180 is more prominent and shows the most narrow width compared to that of RGO-0-180 and RGO-87-95\*, indicating a relatively long domain order or less turbostratic arrangement of graphene stacked sheets<sup>2</sup>. The overall results demonstrate that the hydrazine-assisted solvothermal reduction approach is more efficient in restoring the graphitic crystalline structure than one of them.

## References

1. P. G. Ren, D. X. Yan, X. Ji, T. Chen and Z. M. Li, *Nanotechnology*, 2011, **22**.
2. S. Gilje, S. Dubin, K. Wang, V. C. Tung, K. Cha, A. S. Hall, J. Farrar, R. Varshneya, Y. Yang and R. B. Kaner, *Acs Nano*, 2010, **4**, 3845-3852.
